# Supplementary material
Source: Springer Nature journal article supplement (https://www.springermedizin.de/resource/supplementary/12873_2013_208_MOESM5_ESM.pdf/9431650)
Supplement: MOESM5 [file 9431650]

# Opening doors and cutting A-pillars with hydraulic tools enables the vehicle to open by traction

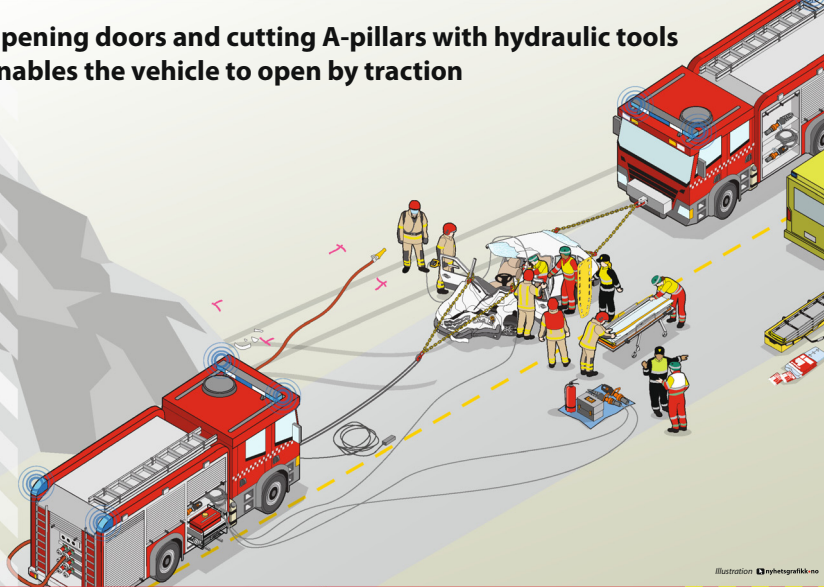

Illustration [nyhetsgrafikk.no](https://www.nyhetsgrafikk.no)

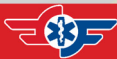

**NORSK LUFTAMBULANSE**  
NORWEGIAN AIR AMBULANCE
